# Supplementary material for: A Systematic Review on the Use of AI for Energy Efficiency and Indoor Environmental Quality in Buildings
Source: MDPI journal article supplement (doi:10.3390/su16093627), 2024-04-26
Supplement: s1 [file s1]

Archive with 1 entries (1 files):
- sustainability-2961246-supplementary.pdf
